# Supplementary material for: Elucidating the assembly of nanoparticle organic hybrid materials (NOHMs) near an electrode interface with varying potential using neutron reflectivity
Source: Royal Society of Chemistry journal article supplement (doi:10.1039/d3nr06621e), 2024-01-01
Supplement: d3nr06621e1.pdf [file d3nr06621e1.pdf]

**Elucidating the assembly of Nanoparticle Organic Hybrid Materials  
(NOHMs) near the electrode interface with varying potential using Neutron  
Reflectivity**

Md Ashraful Haque<sup>a</sup>, Sara T. Hamilton<sup>c,d</sup>, Tony G. Feric<sup>b,d</sup>, Ah-Hyung Alissa Park<sup>b,c,d</sup>,

Mark D. Dadmun<sup>a\*</sup>

<sup>a</sup>Department of Chemistry

The University of Tennessee, Knoxville, TN, 37996, USA

<sup>b</sup>Department of Chemical Engineering,

Columbia University, New York, NY 10027, USA

<sup>c</sup>Department of Earth and Environmental Engineering,

Columbia University, New York, NY 10027, USA

<sup>d</sup>Lenfest Center for Sustainable Energy, The Earth Institute, Columbia University

**Supporting Information:**

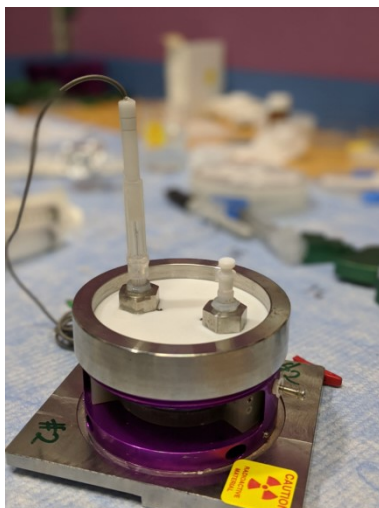

Figure S1 A picture of the cell used for neutron reflectivity experiments.

| <b>Component</b>              | <b>SLD (<math>10^{-6} \text{ \AA}^{-2}</math>)</b> | <b>Additional Relevant Parameters</b> |
|-------------------------------|----------------------------------------------------|---------------------------------------|
| Si                            | 2.07                                               |                                       |
| Au                            | 4.63                                               |                                       |
| Cr                            | 3.03                                               |                                       |
| SiO                           | 2.89                                               |                                       |
| HPE polymer                   | 0.52                                               | MW = 2,000 g/mol,<br>Rg ~ 15 Å        |
| SiO <sub>2</sub> Nanoparticle | 4.20                                               | Diameter = 45 Å                       |
| D <sub>2</sub> O              | 6.35                                               |                                       |
| K                             | 0.49                                               |                                       |
| Zn                            | 3.73                                               |                                       |

Table S1. SLD of the components calculated using neutron activation calculator.

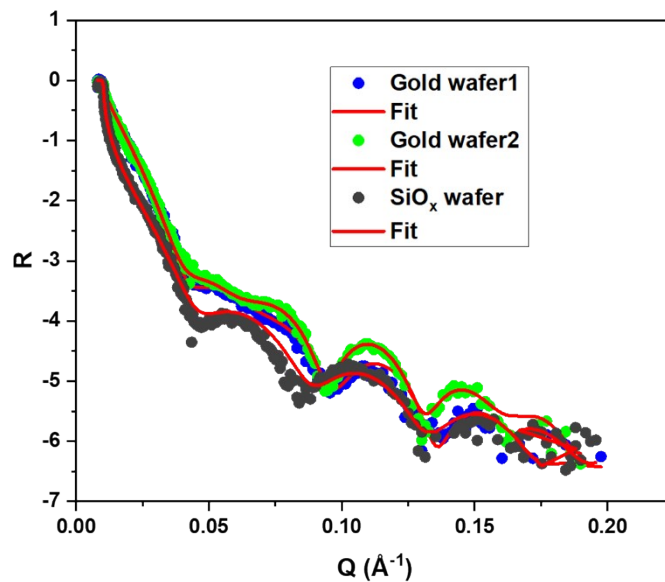

Figure S2 Neutron reflectivity profiles of Au (green and blue circles) and SiO<sub>x</sub> wafers (black circles) with fit (red line)

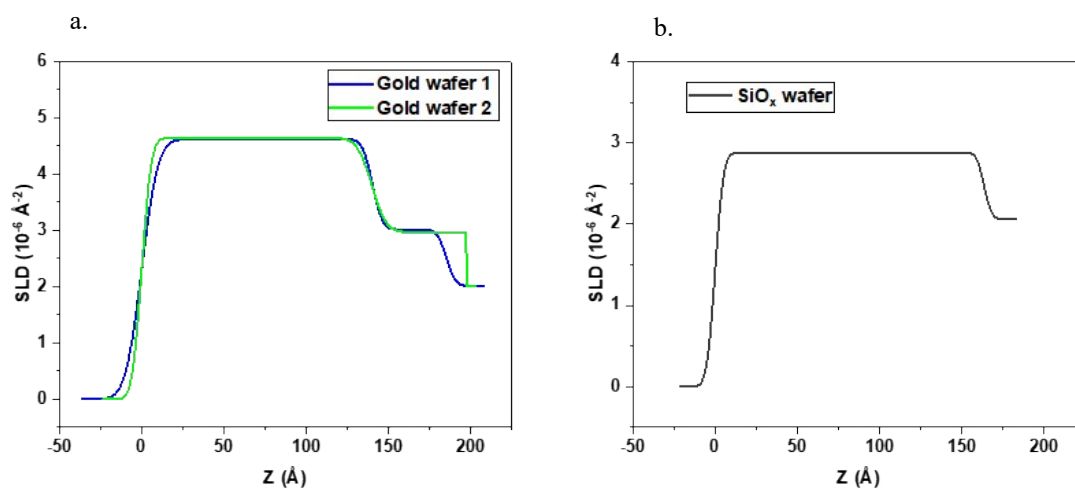

Figure S3 SLD profile of Au (a) and SiO<sub>x</sub> (b) wafers obtained from reflectivity fit of the Au and SiO<sub>x</sub> wafers.

Table S2 Density profile parameters of Au and SiO<sub>x</sub> wafers obtained from the reflectivity fit of the Au and wafers. SiO<sub>x</sub>

| <b>Sample</b>                               | <b>Parameters</b>                             | <b>Si</b>      | <b>SiO<sub>x</sub></b> | <b>Cr</b>      | <b>Au</b>     |
|---------------------------------------------|-----------------------------------------------|----------------|------------------------|----------------|---------------|
|                                             | SLD ( $10^{-6} \text{ \AA}^{-2}$ )<br>± error | 2.07           | 2.89                   |                |               |
| <b>SiO<sub>x</sub><br/>Wafer in<br/>air</b> | Z ( $\text{\AA}$ ) ± error                    | -              | 143 ±<br>0.50          |                |               |
|                                             | R( $\text{\AA}$ ) ± error                     | 1.5            | 4.88 ±<br>0.20         |                |               |
|                                             | SLD ( $10^{-6} \text{ \AA}^{-2}$ )<br>± error | 2.07           | -                      | 3.03           | 4.63          |
| <b>Au Wafer<br/>in air</b>                  | Z ( $\text{\AA}$ ) ± error                    | -              | -                      | 46.4 ±<br>0.12 | 140 ± 1       |
|                                             | R( $\text{\AA}$ ) ± error                     | 4.0 ±<br>0.1   | -                      | 7.96 ±<br>0.01 | 4.94±<br>0.07 |
|                                             | SLD ( $10^{-6} \text{ \AA}^{-2}$ )<br>± error | 2.07           | -                      | 3.03           | 4.63          |
| <b>Au Wafer<br/>in air</b>                  | Z ( $\text{\AA}$ ) ± error                    | -              | -                      | 56.6 ±<br>0.18 | 140 ± 1       |
|                                             | R( $\text{\AA}$ ) ± error                     | 1.00 ±<br>0.01 | -                      | 5.36 ±<br>0.30 | 7.24<br>0.38  |

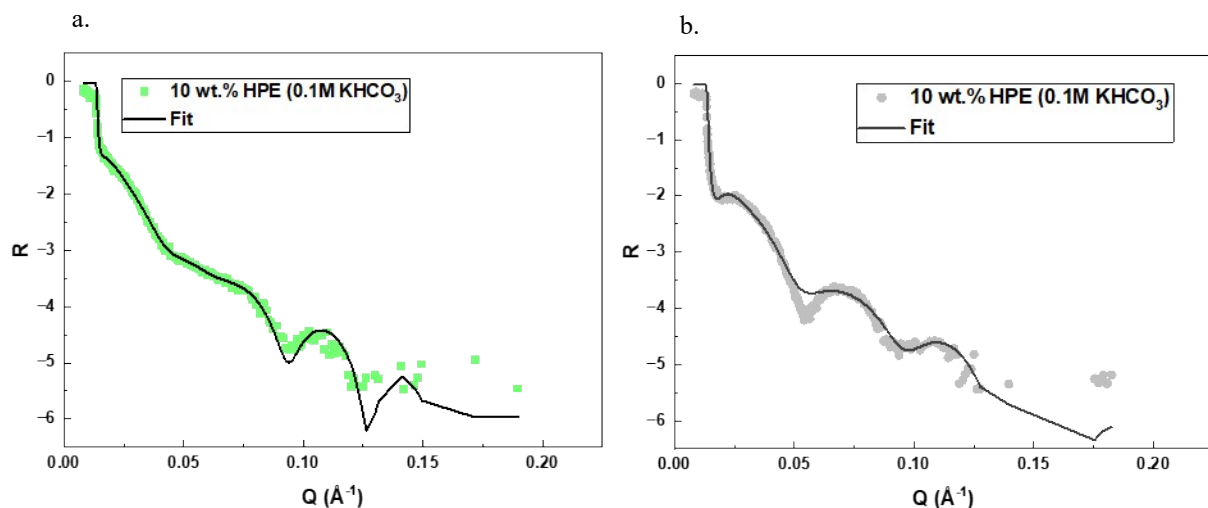

Figure S4 Neutron reflectivity profiles (circles) and fit (line) of 10 wt.% HPE in D<sub>2</sub>O in presence of 0.1 M KHCO<sub>3</sub> salt near Au surface (a) and SiO<sub>x</sub> surface (b).

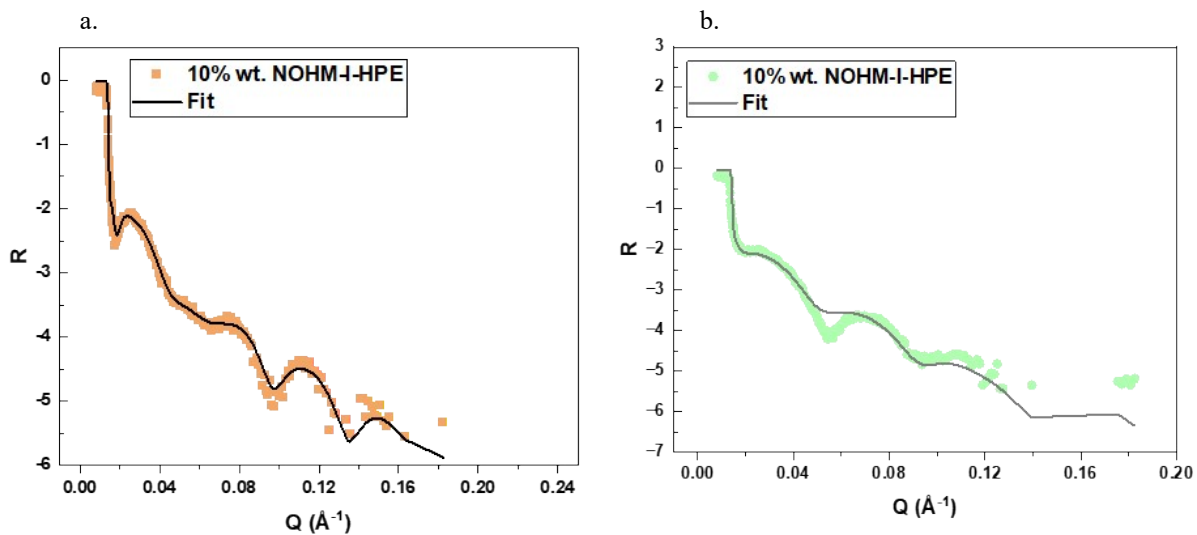

Figure S5. Neutron reflectivity profiles (circles) and fit (black line) of 10 wt.% NOHM-I-HPE in D<sub>2</sub>O near Au surface (a) and SiO<sub>x</sub> surface (b).

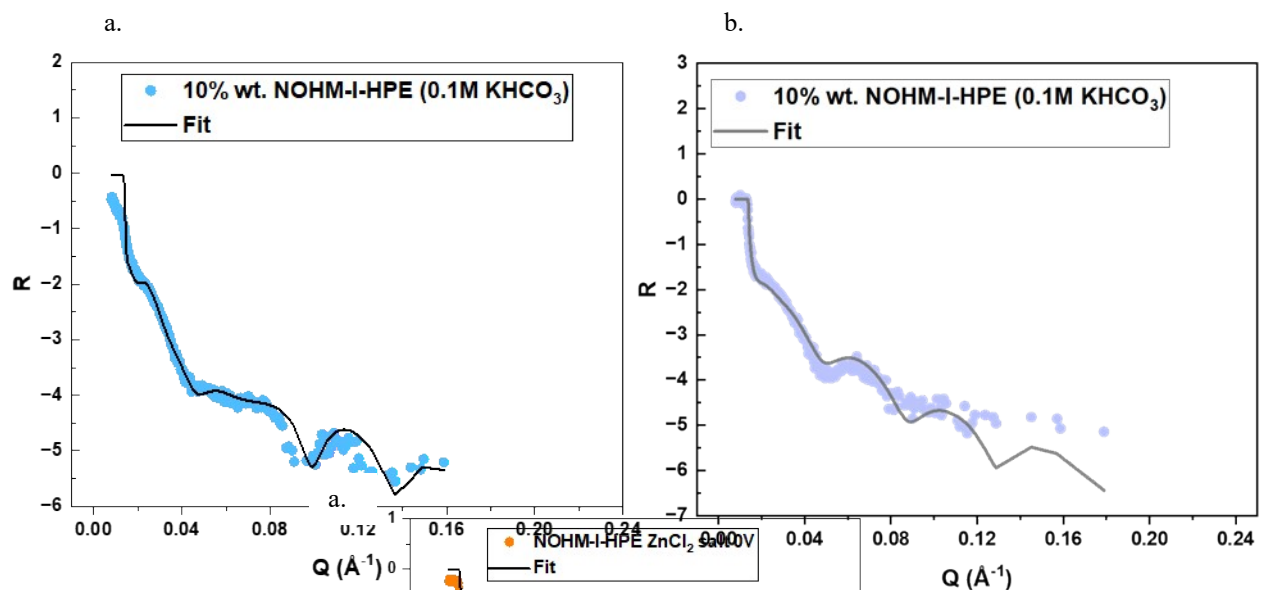

Figure S6 Neutron reflectivity profiles (circles) and fit (lines) of 10 wt.% NOHM-I-HPE in D<sub>2</sub>O in presence of 0.1M KHCO<sub>3</sub> salt near Au surface (a) and SiO<sub>x</sub> surface (b).

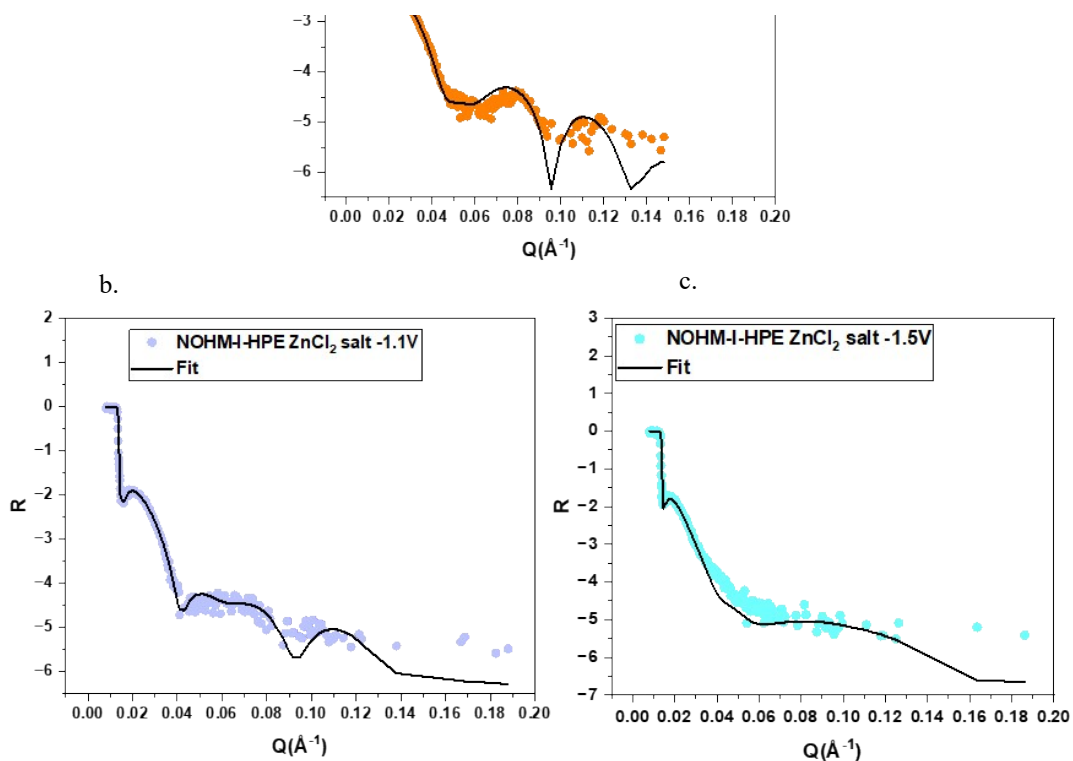

Figure S7 Neutron reflectivity profile (circle) and fit (line) of 10 wt.% NOHM-I-HPE in D<sub>2</sub>O in presence of ZnCl<sub>2</sub> salt near Au surface at different potentials; 0V (a) -1.1V (b), -1.5V (c).
